# Supplementary material
Source: MDPI journal article supplement (https://www.mdpi.com/2072-4292/13/5/897)
Supplement: s1 [file s1]

# Supplementary Material

Supplementary Table S1: A list of vegetation types (fuel types) and their area percent cover mapped from LS + DEM at BCEF.

| <b>Vegetation Type</b>               | <b>Fuel Type</b>                                                             | <b>Percent Cover (%)</b> |
|--------------------------------------|------------------------------------------------------------------------------|--------------------------|
| Black Spruce Woodland with Tussocks  | Black Spruce Woodland w/ Tussocks                                            | 28.72                    |
| Black Spruce/ Tamarack Forest        | Black Spruce-Tamarack Forest                                                 | 3.32                     |
| Bluejoint                            | Bluejoint                                                                    | 0.73                     |
| Post Harvest Bluejoint               | Bluejoint                                                                    | 0.39                     |
| Bluejoint/Shrub & Bluejoint Herb     | Bluejoint-Shrub/Herb                                                         | 1.62                     |
| Closed Black Spruce                  | Closed Black Spruce Forest and Closed Mixed Black Spruce-White Spruce Forest | 15.90                    |
| Closed Black/White Spruce Forest     | Closed Black Spruce Forest and Closed Mixed Black Spruce-White Spruce Forest | 0.96                     |
| Closed Tall Alder                    | Closed Tall Alder-Willow                                                     | 0.40                     |
| Closed Tall Shrub Birch/Willow Shrub | Closed Tall Birch Shrub                                                      | 0.46                     |
| Closed White Spruce                  | Closed White Spruce Forest                                                   | 0.54                     |
| Open Black Spruce                    | Open Black Spruce & Open Mixed Black Spruce                                  | 11.91                    |
| Open Tall Alder                      | Open Tall Alder-Willow                                                       | 0.85                     |
| Open Tall Shrub Birch Shrub          | Open Tall Shrub Birch-Willow                                                 | 5.39                     |
| Open White Spruce                    | Open White Spruce Forest                                                     | 1.22                     |
| Closed Paper Birch                   | Paper Birch-Quaking Aspen Forest                                             | 2.84                     |
| Closed Quaking Aspen Forest          | Paper Birch-Quaking Aspen Forest                                             | 1.48                     |
| Shrub/Bare                           | Shrub/Bare                                                                   | 4.95                     |

|                                          |                                 |      |
|------------------------------------------|---------------------------------|------|
| Closed Quaking Aspen/White Spruce Forest | Spruce-Paper Birch-Aspen Forest | 2.49 |
| Closed Spruce/Paper Birch Forest         | Spruce-Paper Birch-Aspen Forest | 0.11 |
| Closed Spruce/Paper Birch/Aspen Forest   | Spruce-Paper Birch-Aspen Forest | 0.43 |
| Open Quaking Aspen/Spruce Forest         | Spruce-Paper Birch-Aspen Forest | 1.18 |
| Open Spruce/Paper Birch Forest           | Spruce-Paper Birch-Aspen Forest | 7.98 |
| Tussock Tundra                           | Tussock Tundra                  | 0.38 |
| Wet Sedge Meadows                        | Wet Sedge Meadows               | 1.48 |
| Wetlands                                 | Wetlands                        | 4.28 |

Supplementary Table S2: A list of vegetation types (fuel types) and their area percent cover mapped from AVIRIS-NG PCA image + DEM at BCEF.

| <b>Vegetation Type</b>              | <b>Fuel Type</b>                                                             | <b>Percent Cover (%)</b> |
|-------------------------------------|------------------------------------------------------------------------------|--------------------------|
| Black Spruce Woodland with Tussocks | Black Spruce Woodland w/ Tussocks                                            | 18.91                    |
| Black Spruce/ Tamarack Forest       | Black Spruce-Tamarack Forest                                                 | 2.37                     |
| Bluejoint                           | Bluejoint                                                                    | 0.34                     |
| Post Harvest Bluejoint              | Bluejoint                                                                    | 0.14                     |
| Bluejoint/Shrub & Bluejoint Herb    | Bluejoint-Shrub/Herb                                                         | 0.36                     |
| Closed Black Spruce                 | Closed Black Spruce Forest and Closed Mixed Black Spruce-White Spruce Forest | 16.34                    |
| Closed Black/White Spruce Forest    | Closed Black Spruce Forest and Closed Mixed Black Spruce-White Spruce Forest | 0.80                     |

|                                          |                                             |       |
|------------------------------------------|---------------------------------------------|-------|
| Closed Tall Alder                        | Closed Tall Alder-Willow                    | 1.03  |
| Closed Tall Shrub Birch/Willow Shrub     | Closed Tall Birch Shrub                     | 1.00  |
| Closed White Spruce                      | Closed White Spruce Forest                  | 1.63  |
| Open Black Spruce                        | Open Black Spruce & Open Mixed Black Spruce | 9.74  |
| Open Tall Alder                          | Open Tall Alder-Willow                      | 0.23  |
| Open Tall Shrub Birch Shrub              | Open Tall Shrub Birch-Willow                | 5.92  |
| Open White Spruce                        | Open White Spruce Forest                    | 2.15  |
| Closed Paper Birch                       | Paper Birch-Quaking Aspen Forest            | 3.55  |
| Closed Quaking Aspen Forest              | Paper Birch-Quaking Aspen Forest            | 0.55  |
| Shrub/Bare                               | Shrub/Bare                                  | 0.15  |
| Closed Quaking Aspen/White Spruce Forest | Spruce-Paper Birch-Aspen Forest             | 0.30  |
| Closed Spruce/Paper Birch Forest         | Spruce-Paper Birch-Aspen Forest             | 4.32  |
| Closed Spruce/Paper Birch/Aspen Forest   | Spruce-Paper Birch-Aspen Forest             | 0.44  |
| Open Quaking Aspen/Spruce Forest         | Spruce-Paper Birch-Aspen Forest             | 1.44  |
| Open Spruce/Paper Birch Forest           | Spruce-Paper Birch-Aspen Forest             | 25.82 |
| Tussock Tundra                           | Tussock Tundra                              | 0.35  |
| Wet Sedge Meadows                        | Wet Sedge Meadows                           | 1.31  |
| Wetlands                                 | Wetlands                                    | 0.79  |

Supplementary Table S3: Classified CPRW AVIRIS-NG 304 band image percent area by vegetation classes.



Supplementary Table S6: Vegetation type error matrix table on the random forest 304 band AVIRIS BCEF product.

Supplementary Table S7: Vegetation type error matrix table on the random forest 304 band AVIRIS CPCWR product.

Supplementary Table S8: Vegetation type error matrix table on the random forest 5 band PCA AVIRIS CPCRW product.

## Landsat and DEM Random Forest Results

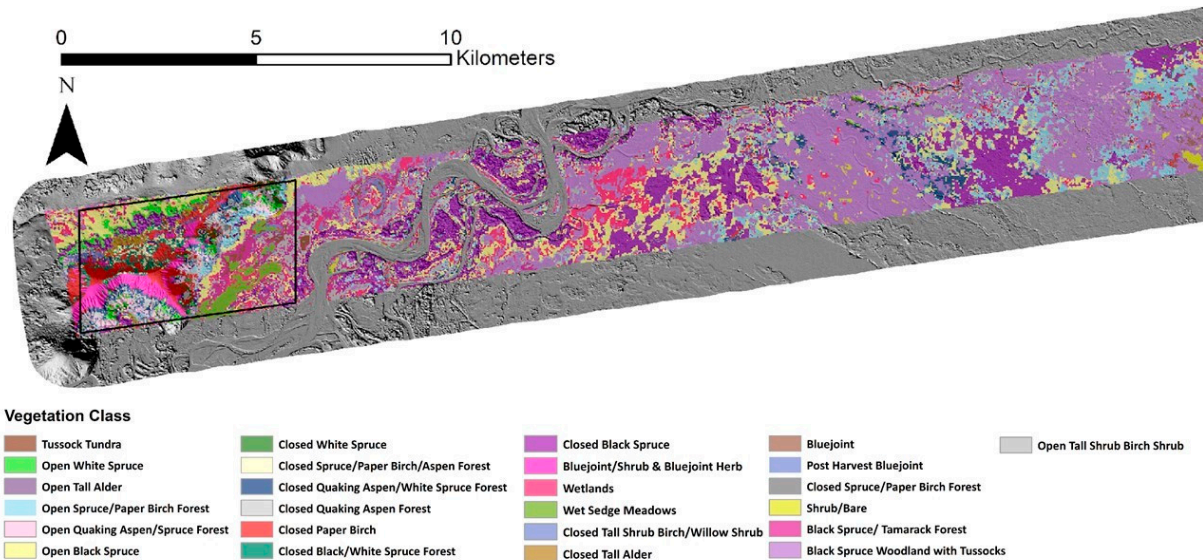

Supplementary Figure S1: Vegetation Map created from Landsat 8 using the Random Forest classifier. This product had a ~65% accuracy at Viereck level IV; ~74% accuracy at Alaska Fuel Model Guide Task Group (2018) fuel type.

## PCA Random Forest Results

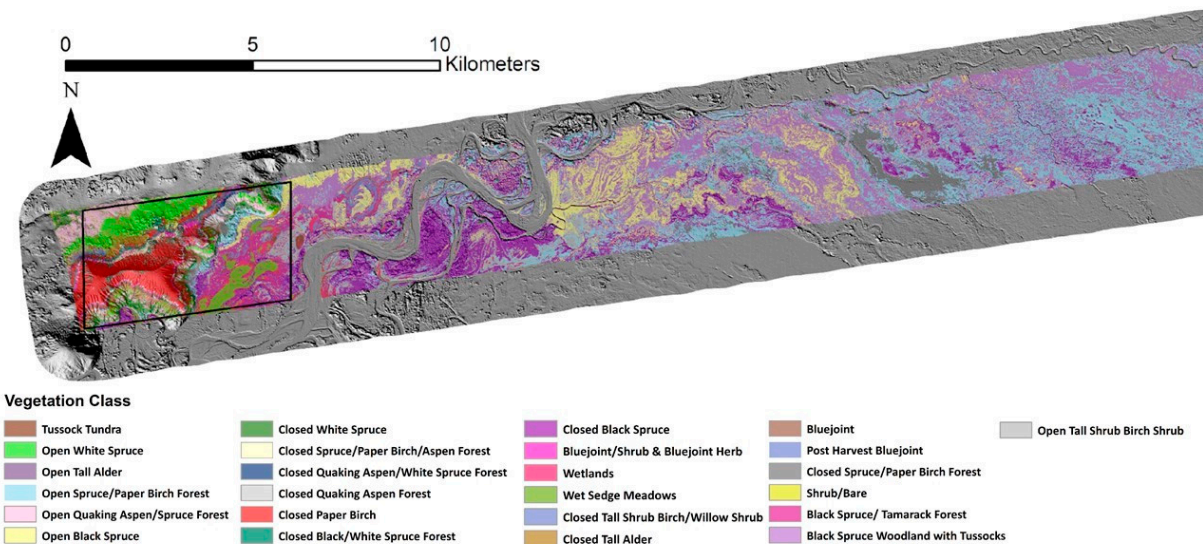

Supplementary Figure S2: Vegetation Map created from AVIRIS PCA bands using the Random Forest classifier. This product had a ~64% accuracy at Viereck level IV; ~72% accuracy at Alaska Fuel Model Guide Task Group (2018) fuel type.

## PCA Random Forest Results

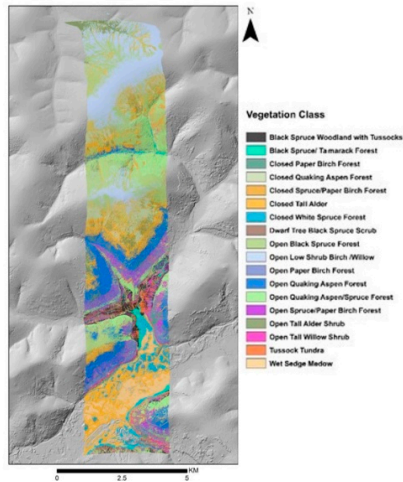

Supplementary Figure S3: Vegetation Map created from AVIRIS PCA bands using the Random Forest classifier. This product had a ~69% accuracy at Viereck level IV; ~74% accuracy at Alaska Fuel Model Guide Task Group (2018) fuel type.

## 304 Bands Random Forest Results

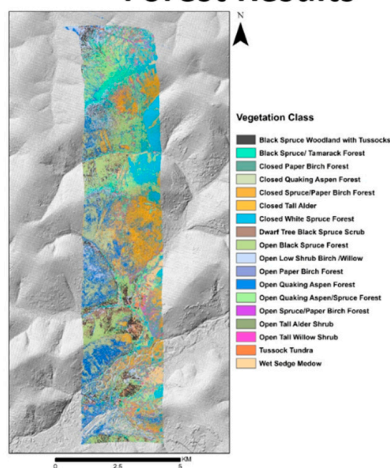

Supplementary Figure S4: Vegetation Map created from 304 AVIRIS bands using the Random Forest classifier. This product had a ~56% accuracy at Viereck level IV; ~61% accuracy at Alaska Fuel Model Guide Task Group (2018) fuel type.
